# Supplementary material
Source: PubMed Central journal article supplement (PMC6055254)
Supplement: DS_10.1177_0022034518763152.pdf [file DS_10.1177_0022034518763152.pdf]

## Hypoplastic AI with Highly Variable Expressivity Caused by *ENAM* Mutations

M. Koruyucu , J. Kang, Y.J. Kim, F. Seymen, Y. Kasimoglu, Z.H. Lee, T.J. Shin, H.K. Hyun,

Y.J. Kim, S.H. Lee, J.C.C. Hu, J.P. Simmer, and J.W. Kim

### Appendix

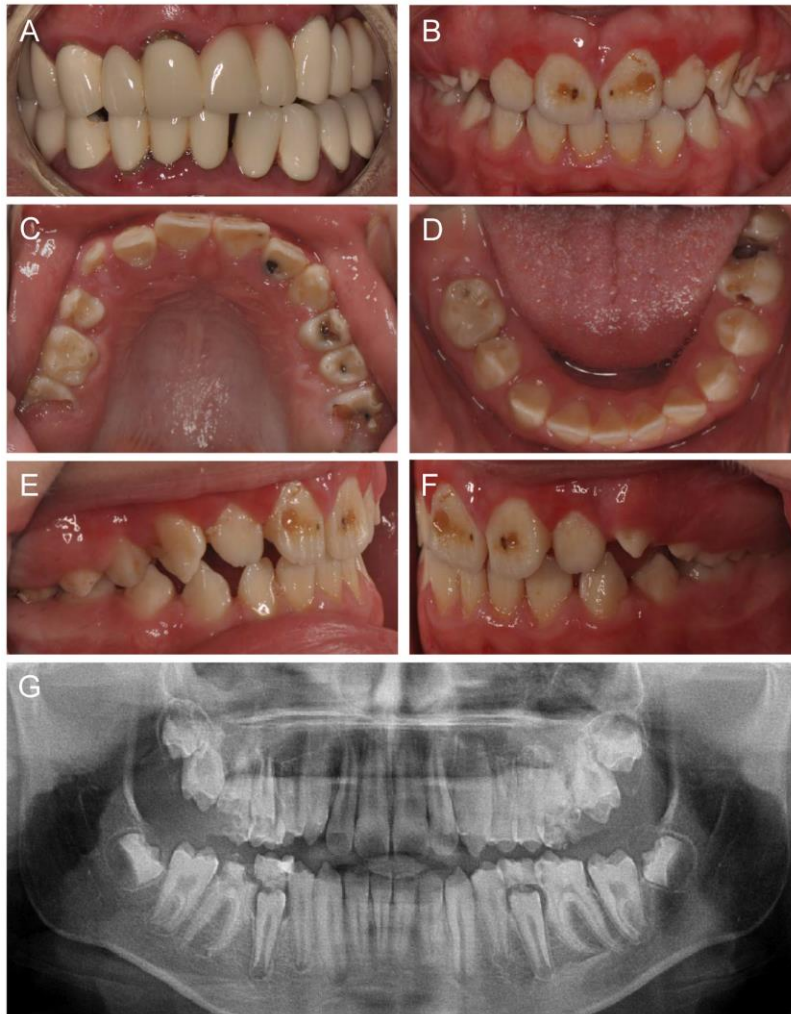

**Appendix Figure 1. Clinical photos and panoramic radiograph from family 1. (A)** Frontal clinical photo of the father (I:1). **(B-F)** Clinical photo of the affected brother of the proband (II:2) at age 11. Generalized hypoplastic enamel can be seen in all teeth. **(G)** Panoramic radiograph of the proband at age 11.

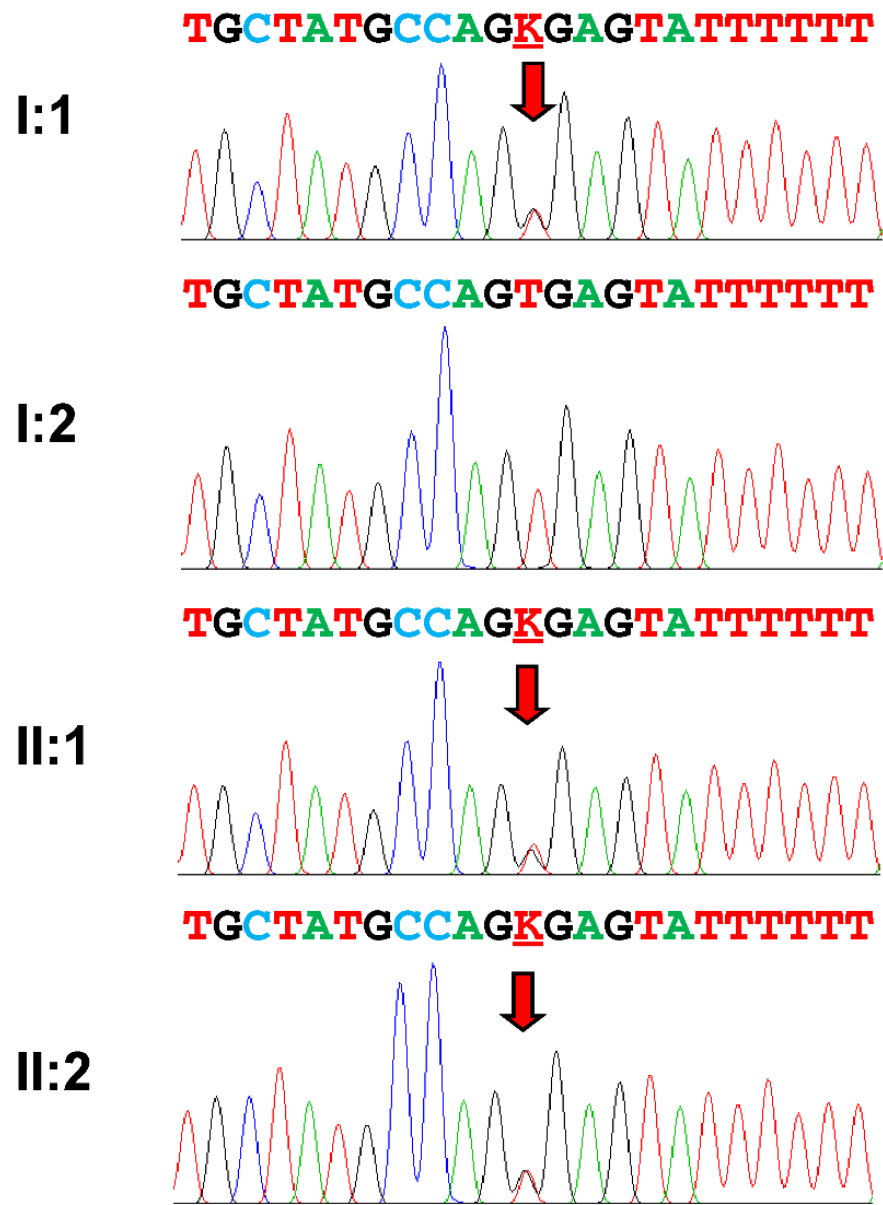

**Appendix Figure 2. Mutational analysis of family 1.** Sequencing chromatograms of all participating individuals. Nucleotide sequences are shown above the chromatograms. A red arrow indicates the mutation [*ENAM* (NM\_031889); c.123+2T>G]. Mutant sequences are underlined with red line (K; T or G).

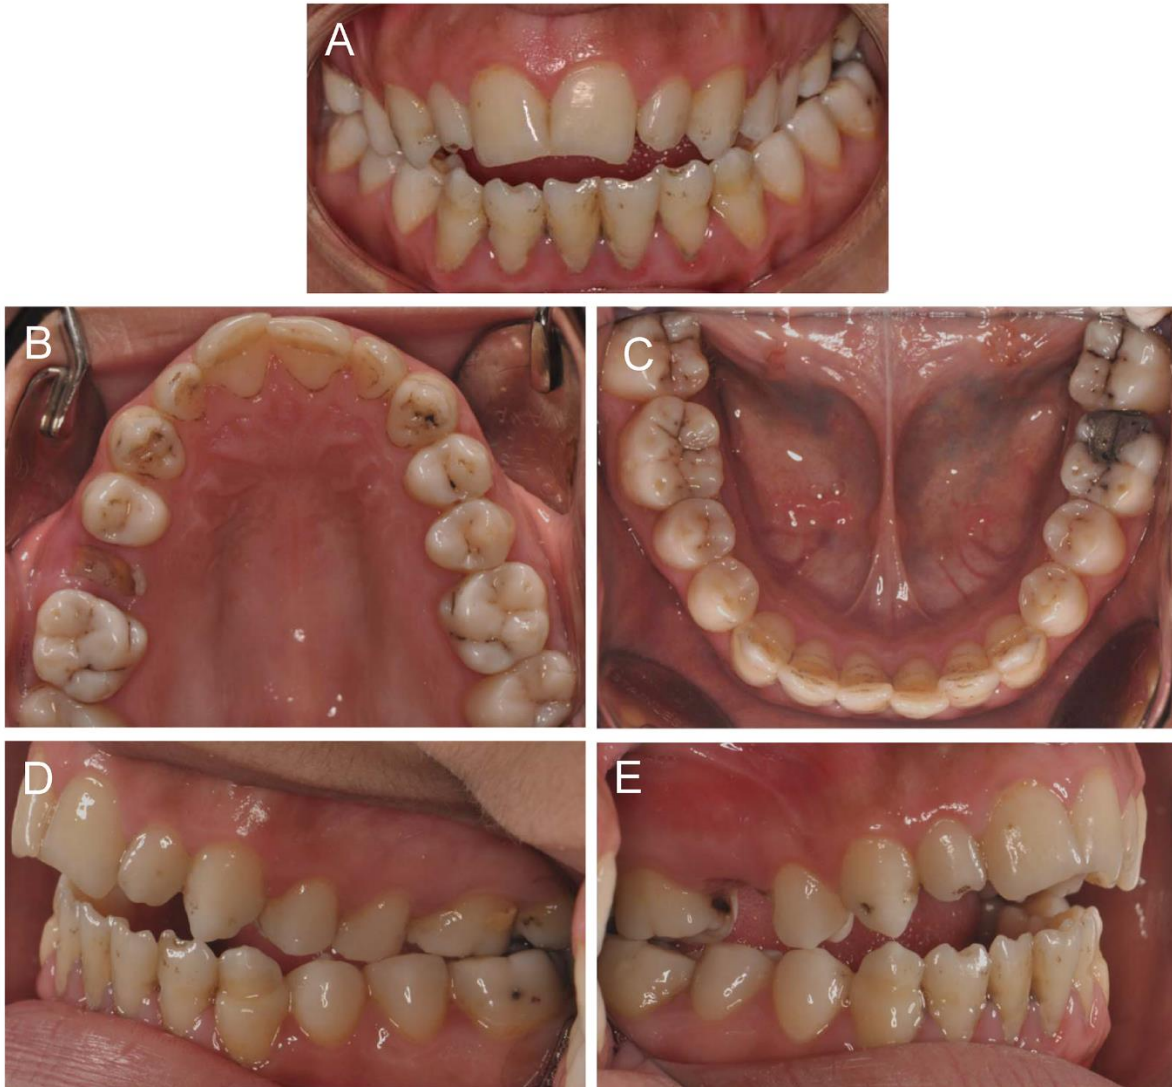

**Appendix Figure 3. Clinical photos of the affected individual (V:1) in family 2 at age 22. (A)** Frontal clinical photo. **(B)** Maxillary occlusal photo. **(C)** Mandibular occlusal photo. **(D)** Mirror image of right buccal photo. **(E)** Mirror image of left buccal photo.

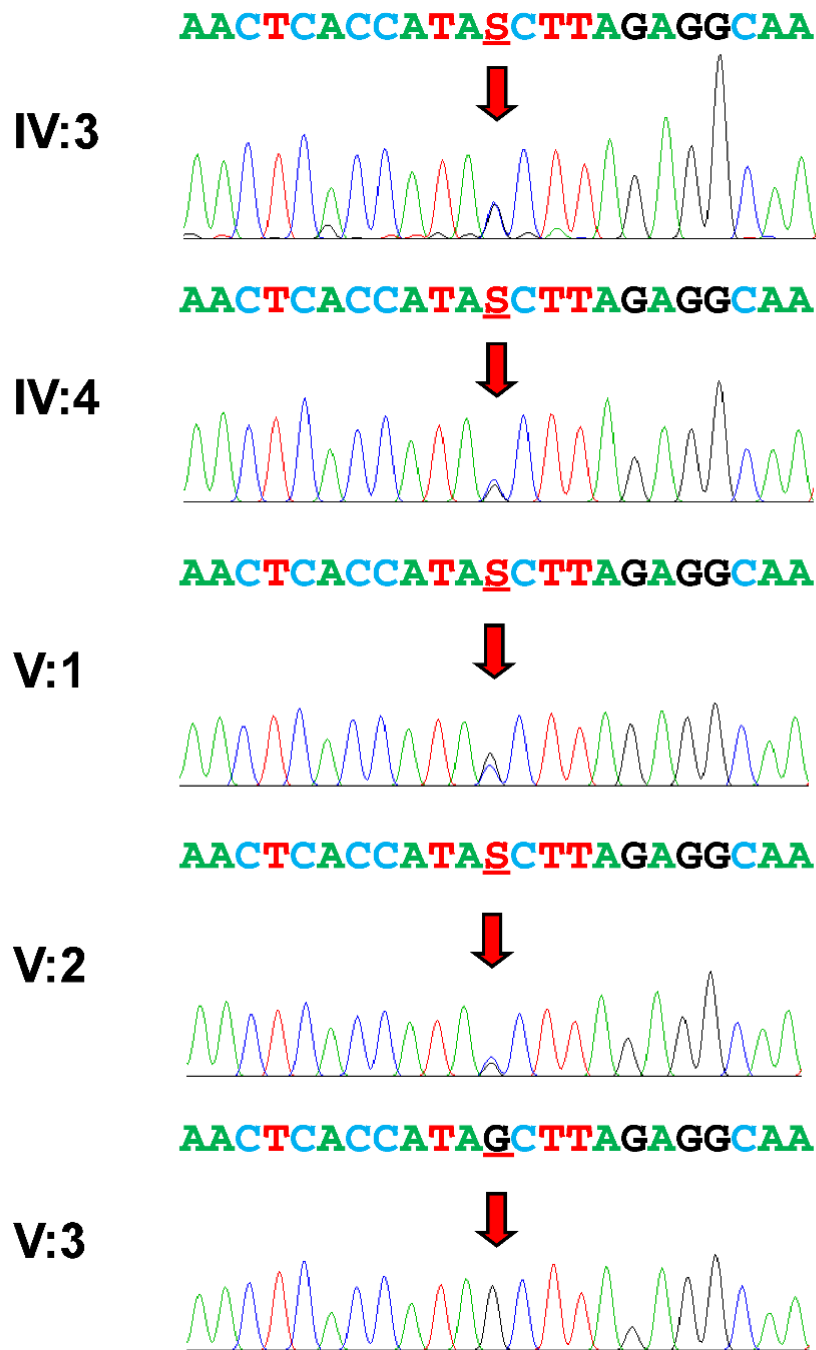

**Appendix Figure 4. Mutational analysis of family 2.** Sequencing chromatograms of all participating individuals. Nucleotide sequences are shown above the chromatograms. A red arrow indicates the mutation [*ENAM* (NM\_031889); c.1842C>G, p.(Tyr614\*)]. Mutant sequences are underlined with red line (S; C or G).



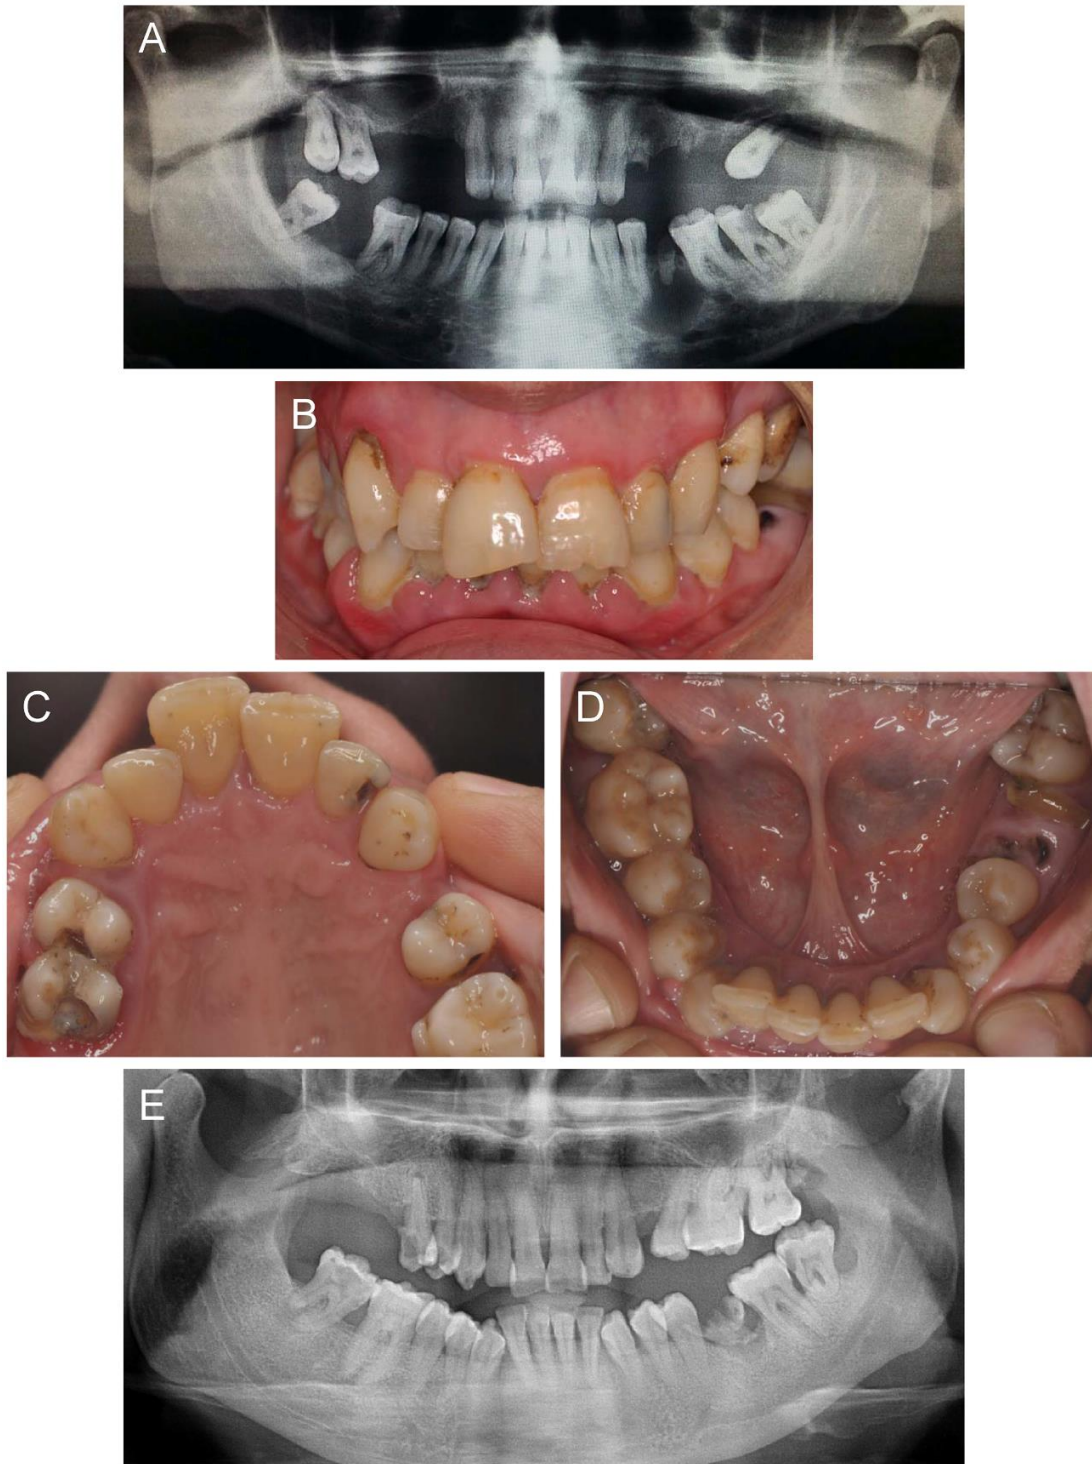

**Appendix Figure 5. Clinical photos of the parents of the proband in family 2. (A)** Panoramic radiograph of the father of the proband (IV:3). **(B-D)** Clinical photos of the mother of the proband (IV:4). **(E)** Panoramic radiograph of the mother of the proband.

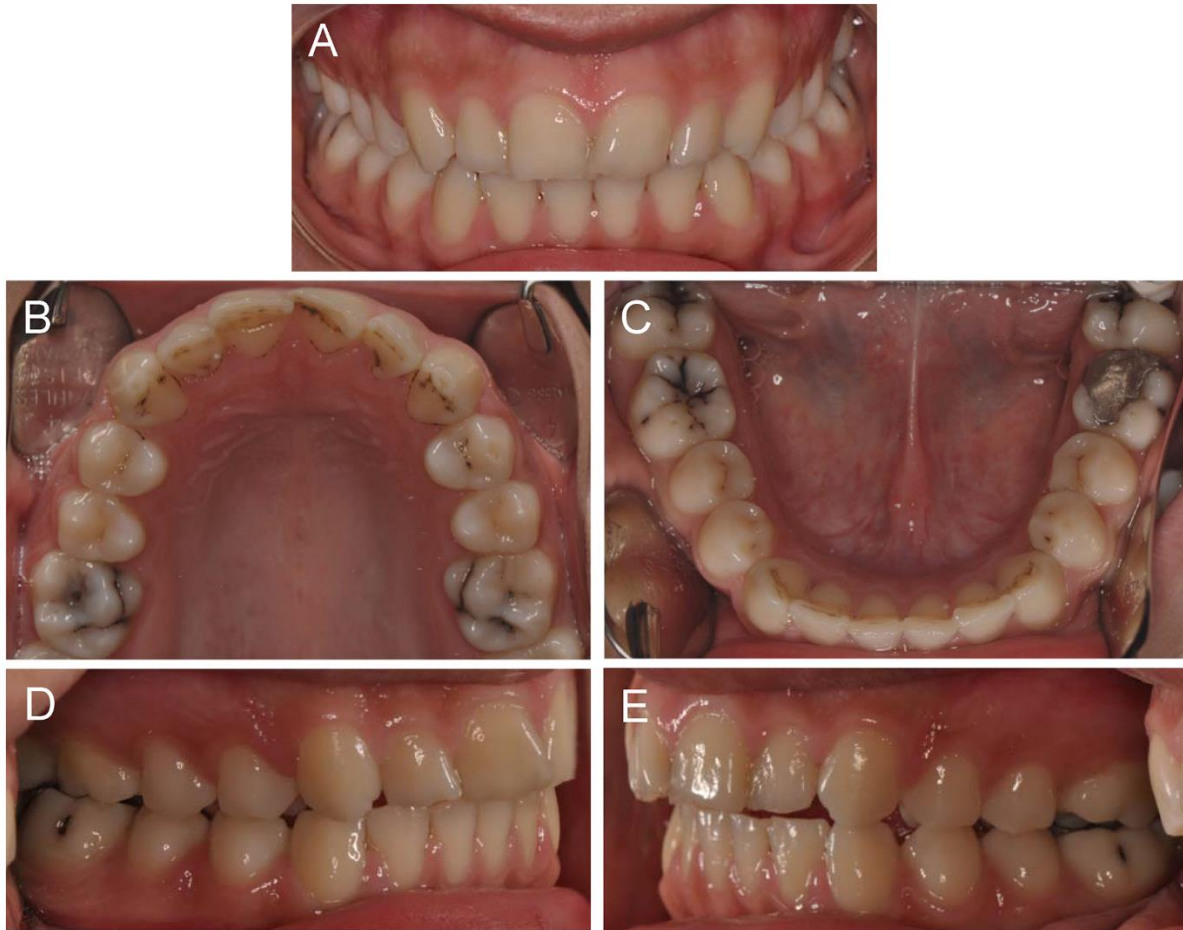

**Appendix Figure 6. Clinical photos of the individual (V:2) in family 2 at age 19. (A) Frontal clinical photo. (B) Maxillary occlusal photo. (C) Mandibular occlusal photo. (D) Mirror image of left buccal photo. (E) Mirror image of right buccal photo.**

**Appendix Table 1. Statistics for exome sequencing.**

| Sample        | Total reads | Mapping rate (%) | Median Target Coverage | Coverage of target region (%) | Fraction of target covered with at least |      |
|---------------|-------------|------------------|------------------------|-------------------------------|------------------------------------------|------|
|               |             |                  |                        |                               | 20X                                      | 10X  |
| Family 1 II:1 | 110,797,272 | 99.8             | 102                    | 96.9                          | 91.8                                     | 93.9 |
| Family 2 V:3  | 106,235,987 | 99.4             | 94                     | 96.9                          | 91.6                                     | 93.8 |

**Appendix Table 2. Disease-causing mutations in *ENAM* gene.**

| Location | cDNA                                    | Protein                                 | Mode of inheritance | References                                                                                                                                  |
|----------|-----------------------------------------|-----------------------------------------|---------------------|---------------------------------------------------------------------------------------------------------------------------------------------|
| Exon 4   | c.92T>G                                 | p.Leu31Arg                              | AD                  | (Brookes et al. 2017)                                                                                                                       |
| Exon 4   | c.107delA                               | p.Asn36Ilefs*22                         | AD                  | (Simmer et al. 2013)                                                                                                                        |
| Intron 4 | c.123+1G>A                              | p.Val19-Pro41del                        | AD                  | (Prasad et al. 2016)                                                                                                                        |
| Intron 4 | c.123+2T>G                              | p.Val19-Pro41del                        | AD                  | This report family 1                                                                                                                        |
| Exon 5   | c.139delA                               | p.Met47Cysfs*11                         | AD                  | (Wang et al. 2015)                                                                                                                          |
| Exon 5   | c.157A>T                                | p.Lys53*                                | AD                  | (Kim et al. 2006; Mardh et al. 2002)                                                                                                        |
| Intron 6 | c.211-2A>C                              | p.Met71-Gln157del                       | AD                  | (Kim et al. 2005)                                                                                                                           |
| Exon 7   | c.358C>T                                | p.Gln120*                               | AD                  | (Seymen et al. 2014)                                                                                                                        |
| Exon 7   | c.406_407insTCAAAA<br>AAGCCGACCACAA     | p.Lys136Ilefs*16                        | AD                  | (Wang et al. 2015)                                                                                                                          |
| Exon 7   | c.454G>T                                | p.Glu152*                               | AD                  | (Seymen et al. 2014)                                                                                                                        |
| Intron 8 | c.534+1G>A                              | p.Ala158-Gln178del                      | AD                  | (Rajpar et al. 2001; Song et al. 2012; Urzua et al. 2005)                                                                                   |
| Exon 9   | c.536G>T                                | p.Arg179Met                             | AD                  | (Gutierrez et al. 2007)                                                                                                                     |
| Intron 9 | c.588+1delG                             | p.Asn197Ilefs*81                        | AD                  | (Hart et al. 2003; Kida et al. 2002; Kim et al. 2005; Pavlic et al. 2007; Wright et al. 2011)                                               |
| Exon 10  | c.647C>T                                | p.Ser216Leu                             | AR/AD               | (Chan et al. 2010)                                                                                                                          |
| Exon 10  | c.737C>A                                | p.Ser246*                               | AD                  | (Ozdemir et al. 2005)                                                                                                                       |
| Exon 10  | c.1020-1021insAGTCAGTACC<br>AGTACTGTGTC | p.Val340-Met341insSerGlnTyrGlnTyrCysVal | AR/AD               | (Ozdemir et al. 2005)                                                                                                                       |
| Exon 10  | c.1259-1260insAG                        | p.Pro422Valfs*27                        | AR/AD               | (Chan et al. 2010; Hart et al. 2003; Kang et al. 2009; Lindemeyer et al. 2010; Ozdemir et al. 2005; Pavlic et al. 2007; Wright et al. 2011) |
| Exon 10  | c.1842C>G                               | p.Tyr614*                               | AR/AD               | This report family 2                                                                                                                        |
| Exon 10  | c.2991delT                              | p.Leu998Trpfs*65                        | AD                  | (Kang et al. 2009)                                                                                                                          |

\*Sequences based on the reference sequence for mRNA (NM\_031889.2) and protein (NP\_114095.2), where the A of the ATG translation initiation codon is nucleotide 1. These variants can be found in the LOVD database (<http://dna2.leeds.ac.uk/LOVD/genes>) and the ClinVar database at NCBI (<https://www.ncbi.nlm.nih.gov/clinvar/>).



## REFERENCES

- Brookes SJ, Barron MJ, Smith CEL, Poulter JA, Mighell AJ, Inglehearn CF, Brown CJ, Rodd H, Kirkham J, Dixon MJ. 2017. Amelogenesis imperfecta caused by n-terminal enamelin point mutations in mice and men is driven by endoplasmic reticulum stress. *Hum Mol Genet.* 26(10):1863-1876.
- Chan HC, Mai L, Oikonomopoulou A, Chan HL, Richardson AS, Wang SK, Simmer JP, Hu JC. 2010. Altered enamelin phosphorylation site causes amelogenesis imperfecta. *J Dent Res.* 89(7):695-699.
- Gutierrez SJ, Chaves M, Torres DM, Briceno I. 2007. Identification of a novel mutation in the enamelin gene in a family with autosomal-dominant amelogenesis imperfecta. *Arch Oral Biol.* 52(5):503-506.
- Hart TC, Hart PS, Gorry MC, Michalec MD, Ryu OH, Uygur C, Ozdemir D, Firatli S, Aren G, Firatli E. 2003. Novel enam mutation responsible for autosomal recessive amelogenesis imperfecta and localised enamel defects. *J Med Genet.* 40(12):900-906.
- Kang HY, Seymen F, Lee SK, Yildirim M, Tuna EB, Patir A, Lee KE, Kim JW. 2009. Candidate gene strategy reveals enam mutations. *J Dent Res.* 88(3):266-269.
- Kida M, Ariga T, Shirakawa T, Oguchi H, Sakiyama Y. 2002. Autosomal-dominant hypoplastic form of amelogenesis imperfecta caused by an enamelin gene mutation at the exon-intron boundary. *J Dent Res.* 81(11):738-742.
- Kim JW, Seymen F, Lin BP, Kiziltan B, Gencay K, Simmer JP, Hu JC. 2005. Enam mutations in autosomal-dominant amelogenesis imperfecta. *J Dent Res.* 84(3):278-282.
- Kim JW, Simmer JP, Lin BP, Seymen F, Bartlett JD, Hu JC. 2006. Mutational analysis of candidate genes in 24 amelogenesis imperfecta families. *Eur J Oral Sci.* 114: Appendix (1):3-12; discussion 39-41, 379.
- Lindemeyer RG, Gibson CW, Wright TJ. 2010. Amelogenesis imperfecta due to a mutation of the enamelin gene: Clinical case with genotype-phenotype correlations. *Pediatr Dent.* 32(1):56-60.
- Mardh CK, Backman B, Holmgren G, Hu JC, Simmer JP, Forsman-Semb K. 2002. A nonsense mutation in the enamelin gene causes local hypoplastic autosomal dominant amelogenesis imperfecta (aih2). *Hum Mol Genet.* 11(9):1069-1074.
- Ozdemir D, Hart PS, Firatli E, Aren G, Ryu OH, Hart TC. 2005. Phenotype of enam mutations is dosage-dependent. *J Dent Res.* 84(11):1036-1041.
- Pavlic A, Petelin M, Battelino T. 2007. Phenotype and enamel ultrastructure characteristics in patients with enam gene mutations g.13185-13186insag and 8344delg. *Arch Oral Biol.* 52(3):209-217.
- Prasad MK, Geoffroy V, Vicaire S, Jost B, Dumas M, Le Gras S, Switala M, Gasse B, Laugel-Haushalter V, Paschaki M et al. 2016. A targeted next-generation sequencing assay for the molecular diagnosis of genetic disorders with orodental involvement. *J Med Genet.* 53(2):98-110.
- Rajpar MH, Harley K, Laing C, Davies RM, Dixon MJ. 2001. Mutation of the gene encoding the enamel-specific protein, enamelin, causes autosomal-dominant amelogenesis imperfecta. *Hum Mol Genet.* 10(16):1673-1677.
- Seymen F, Lee KE, Koruyucu M, Gencay K, Bayram M, Tuna EB, Lee ZH, Kim JW. 2014. Enam mutations with incomplete penetrance. *J Dent Res.* 93(10):988-992.

- Simmer SG, Estrella NM, Milkovich RN, Hu JC. 2013. Autosomal dominant amelogenesis imperfecta associated with enam frameshift mutation p.Asn36ilefs56. Clin Genet. 83(2):195-197.
- Song YL, Wang CN, Zhang CZ, Yang K, Bian Z. 2012. Molecular characterization of amelogenesis imperfecta in chinese patients. Cells Tissues Organs. 196(3):271-279.
- Urzua OB, Ortega PA, Rodriguez ML, Morales BI. 2005. [genetic, clinical and molecular analysis of a family affected by amelogenesis imperfecta]. Rev Med Chil. 133(11):1331-1340.
- Wang X, Zhao Y, Yang Y, Qin M. 2015. Novel enam and lamb3 mutations in chinese families with hypoplastic amelogenesis imperfecta. PloS one. 10(3):e0116514.
- Wright JT, Torain M, Long K, Seow K, Crawford P, Aldred MJ, Hart PS, Hart TC. 2011. Amelogenesis imperfecta: Genotype-phenotype studies in 71 families. Cells Tissues Organs. 194(2-4):279-283.
